# The *NFKB1* Promoter Polymorphism (–94ins/delATTG) Alters Nuclear Translocation of NF- $\kappa$ B1 in Monocytes after Lipopolysaccharide Stimulation and Is Associated with Increased Mortality in Sepsis

Michael Adamzik, M.D.,\* Simon Schäfer, M.D.,† Ulrich H. Frey, M.D.,\* Arne Becker, M.D.,† Maximiliane Kreuzer,‡ Sandra Winning, Ph.D.,§ Stilla Frede, Ph.D.,|| Jörg Steinmann, M.D.,# Joachim Fandrey, M.D.,|| Kai Zacharowski, M.D.,\*\* Winfried Siffert, M.D.,†† Jürgen Peters, M.D.,‡‡ Matthias Hartmann, M.D.‡‡

## ABSTRACT

**Background:** Because the nuclear factor- $\kappa$ B (NF- $\kappa$ B) coupled pathway is believed to amplify inflammation prevailing in sepsis, the authors tested the hypotheses that the insertion–deletion polymorphism (–94ins/delATTG) (1) alters nuclear translocation of nuclear factor- $\kappa$ B and activator protein-1 (NF- $\kappa$ B1) in monocytes after lipopolysaccharide stimulation; (2) affects lipopolysaccharide-induced NF- $\kappa$ B1 messenger RNA expression, tumor necrosis factor  $\alpha$  concentrations, and

\* Associate Professor, † Research Assistant, ‡ Medical Student, ‡‡ Professor, Klinik für Anästhesiologie und Intensivmedizin, § Associate Professor, || Professor, Institut für Physiologie, # Research Assistant, Institut für Medizinische Mikrobiologie, †† Professor, Institut für Pharmakogenetik, Universität Duisburg-Essen, Universitätsklinikum Essen, Essen, Germany. \*\* Professor, Klinik für Anästhesiologie, Intensivmedizin und Schmerztherapie, Klinikum der Goethe Universität Frankfurt, Frankfurt, Germany.

Received from the Department of Anaesthesiology and Intensive Care Medicine, University Duisburg-Essen, University Hospital Essen, Essen, Germany. Submitted for publication October 16, 2011. Accepted for publication September 6, 2012. Support was provided solely from institutional and/or departmental sources. Dr. Schäfer and Dr. Adamzik contributed equally to this work. Parts of this work were presented at the 5th International Congress “Sepsis and Multiorgan Dysfunction” Weimar Sepsis Update 2011—Bridging the Gap, September 7–10, 2011, Weimar, Germany, and were published as an abstract (Adamzik M, Schaefer S, Frey UH, Becker A, Kreuzer M, Winning S, Frede S, Steinmann J, Fandrey J, Zacharowski K, Siffert W, Peters J, Hartmann M: The NFKB1 promoter polymorphism (94ins/delATTG) alters nuclear translocation of NFKB1 in monocytes after lipopolysaccharide stimulation and is associated with increased mortality in sepsis. *Infection* 2011; 39:S101–2).

Address correspondence to Dr. Adamzik: Klinik für Anästhesiologie und Intensivmedizin, Universitätsklinikum Essen, Hufelandstr. 55, D-45122 Essen, Germany. michael.adamzik@uk-essen.de. This article may be accessed for personal use at no charge through the Journal Web site, www.anesthesiology.org.

Copyright © 2012, the American Society of Anesthesiologists, Inc. Lippincott Williams & Wilkins. *Anesthesiology* 2013; 118:123–33

## What We Already Know about This Topic

- The nuclear factor- $\kappa$ B and activator protein-1–coupled signaling pathway of the innate immune system is known to amplify and perpetuate inflammatory and coagulatory mechanisms in sepsis
- Genetic variations that alter nuclear factor- $\kappa$ B gene expression could affect pathophysiologic mechanisms and thereby influence mortality in severe sepsis

## What This Article Tells Us That Is New

- A functional insertion–deletion polymorphism in the promoter of nuclear factor- $\kappa$ B and activator protein-1 affected expression and regulation of mediators of inflammation and coagulation *in vitro*
- Expression of the same polymorphism was associated with increased 30-day mortality in patients with severe sepsis

tissue factor activity; and (3) may be associated with increased 30-day mortality in patients with sepsis.

**Methods:** Nuclear translocation of NF- $\kappa$ B1 in monocytes after lipopolysaccharide stimulation from healthy blood donors was performed with immunofluorescence staining ( $n = 5$  each). Lipopolysaccharide-induced NF- $\kappa$ B1 messenger RNA expression was measured with real-time polymerase chain reaction (PCR;  $n = 60$ ), tumor necrosis factor  $\alpha$  concentrations with a multiplexing system kit ( $n = 60$ ), and tissue factor activity with thromboelastometry ( $n = 105$ ). In a prospective study, multivariate proportional hazard analysis tested 30-day mortality in patients with sepsis ( $n = 143$ ).

**Methods and Results:** The homozygous deletion genotype compared with the homozygous insertion genotype was associated with a nearly twofold increase in nuclear translocation of NF- $\kappa$ B1 ( $P = 0.001$ ), a threefold difference in NF- $\kappa$ B1

messenger RNA expression ( $P = 0.001$ ), and a twofold increase in tissue factor expression ( $P = 0.021$ ). The deletion allele in adults with severe sepsis was tested as an independent prognostic factor for 30-day mortality (hazard ratio, 2.3; 95% CI, 1.13–4.8;  $P = 0.022$ ). Mortality was 25% for homozygous insertion genotypes but 41% for combined heterozygous deletion/homozygous deletion genotypes ( $P = 0.034$ ).

**Conclusion:** The deletion allele of the NF $\kappa$ B1 insertion–deletion (–94ins/delATTG) polymorphism is associated with increased 30-day mortality in patients with severe sepsis and increased reaction of the innate immune system.

**T**HERE is wide variability regarding the outcome in severe sepsis, which in part may be caused by genetic variations.<sup>1–3</sup> A potential candidate for such variations is the gene encoding nuclear factor- $\kappa$ B and activator protein-1 (NF- $\kappa$ B1), because the ubiquitous transcription factor NF- $\kappa$ B1 binds to recognition elements in the promoter regions of several genes encoding the innate immune and the coagulation system. The nuclear factor- $\kappa$ B family comprises five proteins, NF- $\kappa$ B1, NF- $\kappa$ B2, RelA, RelB, and c-Rel. Nuclear factor- $\kappa$ B family members share structural homology with the retroviral oncoprotein v-Rel, resulting in their classification as NF- $\kappa$ B/Rel proteins. The *NFKB1* gene encodes the NF- $\kappa$ B-p105 subunit. NF- $\kappa$ B1 and NF- $\kappa$ B2 proteins are translated as large precursors, p105 and p100, which undergo processing, regulated by the ubiquitin–proteasome pathway, to build the mature nuclear factor- $\kappa$ B subunits, p50 and p52.

In most cells, NF- $\kappa$ B1 is found in the cytoplasm in its inactive form, bound to inhibitory proteins. Many extracellular stimuli, including bacterial lipopolysaccharide, viruses, oxidants, inflammatory cytokines, and immune stimuli, can activate NF- $\kappa$ B1.<sup>4,5</sup> Once activated, it binds to regulatory DNA elements in the promoter regions of inflammatory and immune response genes, such as those encoding proinflammatory cytokines, chemokines, enzymes relevant for inflammation, and adhesion molecules.<sup>6,7</sup> Furthermore, this pathway induces tissue factor in the blood stream and, thus, activates coagulation.<sup>7–10</sup> Consequently, disseminated intravascular coagulation is a common finding during severe sepsis, which in turn can evoke ischemia and multiple organ dysfunction.<sup>8,9</sup> In conclusion, the NF- $\kappa$ B1–coupled pathway is known to amplify and perpetuate inflammatory and coagulatory mechanisms prevailing in sepsis.<sup>10</sup> Accordingly, genetic variations that alter *NFKB* gene expression could impact key mechanisms in sepsis and, therefore, influence mortality in severe sepsis.

Recently, a functional insertion–deletion polymorphism in the promoter of *NFKB1* (–94ins/delATTG in relation to the transcription initiation site or –24.219ins/delATTG in relation to the A as +1 of the initiation codon ATG), which encodes the major isoform of NF- $\kappa$ B1, was reported to be associated with altered *NFKB1* gene expression and an increased risk for ulcerative colitis.<sup>11</sup> Furthermore, we found that the deletion allele influences severity but not mortality of patients suffering from acute respiratory distress

syndrome.<sup>12</sup> In conclusion, there are many reasons to suspect that the *NFKB1* insertion–deletion (–94ins/delATTG) polymorphism could impact key mechanisms in sepsis and, therefore, influence mortality in severe sepsis.

Accordingly, we prospectively tested the hypotheses that the *NFKB1* insertion–deletion (–94ins/delATTG) polymorphism (1) alters nuclear translocation of NF- $\kappa$ B1 in monocytes after lipopolysaccharide stimulation; (2) affects lipopolysaccharide-induced NF $\kappa$ B1 messenger RNA (mRNA) expression, tumor necrosis factor- $\alpha$  (TNF $\alpha$ ) concentration, and tissue factor activity; and (3) may be associated with increased 30-day mortality in patients with severe sepsis.<sup>13</sup>

## Materials and Methods

### Experimental Procedures

**Nuclear Translocation of NF- $\kappa$ B1 in Monocytes after Lipopolysaccharide Stimulation Is Dependent on the NFKB1 Promoter Polymorphism (–94ins/delATTG).** After ethics committee approval (ethics committee of the University Hospital Essen, Essen, Germany) and written informed consent, venous blood (24 ml) was withdrawn from 10 healthy individuals with the homozygous insertion (II) or deletion (DD) genotype, respectively, and centrifuged at 1800g for 20 min using Ficoll density gradient centrifugation tubes (Vacutainer CPT tubes; Becton Dickinson, Franklin Lakes, NJ). Monocytes were resuspended in RPMI 1640 medium (Gibco Products Invitrogen Corporation, Grand Island, NY) containing 5% fetal calf serum (Biochrom AG, Berlin, Germany) and antibiotics (100 U/ml penicillin and 100  $\mu$ g/ml streptomycin; Invitrogen Corporation, Carlsbad, CA). The cell suspension was added to cell culture tubes, and monocytes were allowed to adhere to the surface of the tubes for 2 h. Finally, the supernatant was discarded, fresh RPMI 1640 medium was added, and the cells were allowed to rest for 48 h (37°C; 5% CO<sub>2</sub> in air) before the experiments. Meanwhile, 12 mm glass plates were coated with 400  $\mu$ l fibronectin (1 mg/ml; Sigma-Aldrich, St. Louis, MO) inside 24-well plates for 24 h. Afterward, the supernatant was discarded and 500  $\mu$ l cell suspension (1  $\times$  10<sup>6</sup> monocytes ml<sup>-1</sup>) was added. Cells were incubated for 60 min either with lipopolysaccharide (10  $\mu$ g/ml, serotype 0111:B4, Sigma-Aldrich) or without lipopolysaccharide. After incubation, cells were fixed with ice-cold methanol–acetone (1:1) for 10 min at –20°C. Immunofluorescence staining was performed using a primary NF B rabbit antihuman polyclonal p65 antibody (1:200 dilution; Santa Cruz Biotechnologies, Santa Cruz, CA) followed by a Immunoglobulin G - Alexa-fluor 568 coupled goat anti-rabbit antibody (1:400 dilution; Molecular Probes, Eugene, OR), as described previously.<sup>14</sup>

An independent investigator, blind for the specific *NFKB1* promoter polymorphism and stimulus applied, processed all immunofluorescence slides. Fluorescence microscopy was performed on a Nikon Eclipse E1000 microscope (Nikon GmbH, Düsseldorf, Germany) using the NIS-Elements F.30.0 imaging software (Laboratory Imaging, Prague, Czech

Republic). All slides were analyzed in a standardized order, that is, a representative image of each quadrant was captured at 20-fold magnification, and nuclear NF- $\kappa$ B-positive cells were counted using an Image J software (ImageJ; National Institute of Health, Bethesda, MD).

**NF- $\kappa$ B1 mRNA Expression, TNF $\alpha$  Concentration, and Tissue Factor Activity after Lipopolysaccharide Stimulation as Dependent on the NF- $\kappa$ B1 Promoter Polymorphism (-94ins/delATTG).** After approval by the ethics committee of the University Hospital Essen and written informed consent, venous blood was drawn from the antecubital vein of 105 healthy volunteers. After discarding the first 2 ml, blood was collected in one-tenth volume of citrate (Sarstedt Monovette, Nümbrecht, Germany) and samples were immediately used for the experiments. Subsequently, whole blood samples were incubated with lipopolysaccharide at final concentrations of 0, 25, 75, and 225  $\mu$ g/ml for 4 h at 37°C. Thereafter, samples were subjected to thromboelastometry, and mRNA and DNA were isolated as described in DNA Genotyping. In addition, TNF $\alpha$  concentration was determined in plasma obtained from whole blood samples after incubation with lipopolysaccharide (225  $\mu$ g/ml; n = 60).

To further elucidate the mechanism of the lipopolysaccharide-induced activation of coagulation, lipopolysaccharide- and vehicle (NaCl 0.9%)-treated whole blood samples were incubated with the protein synthesis inhibitor cycloheximide (35  $\mu$ M) and with an inhibitor of tissue factor effects, active site-inhibited factor seven (50  $\mu$ g/ml), for 30 min, subsequently challenged with lipopolysaccharide (225  $\mu$ g/ml) or vehicle (NaCl 0.9%) for 4 h, and then subjected to thromboelastometry as recently described.<sup>15,16</sup> To assess the tissue factor concentrations induced by lipopolysaccharide, a standard curve was generated by addition of tissue factor standard to whole blood samples and the resulting clotting time was determined.

### Thromboelastometry

Citrate blood samples were subjected to rotational thromboelastometry (Roteg 5<sup>TM</sup>, Pentapharm, Munich, Germany), a modification of the original thromboelastography described in 1948 by Hartert,<sup>17</sup> and coagulation was initiated by recalcification with calcium chloride.<sup>18,19</sup> Clotting times were determined from the thromboelastogram as described in References 18 and 19. Kinetics of clot formations are measured by the clot formation time and the angle  $\alpha$ . The maximum amplitude reflects the strength of the clot and is dependent on both the number and function of platelets and their interaction with fibrin.<sup>18,19</sup>

### Measurement of TNF $\alpha$

TNF $\alpha$  plasma levels were determined by using a microsphere-based multiplexing system kit (Invitrogen, Paisley, United Kingdom). As previously shown, the assays were performed according to the manufacturer's protocol and concentrations measured with a Luminex 100 system (Luminex, Austin, TX).<sup>20</sup>

### NF- $\kappa$ B1 mRNA Expression

RNA from whole blood (n = 105) was extracted using the RNeasy kit (Qiagen, Hilden, Germany). First-strand complementary DNA was synthesized from 0.6  $\mu$ g of total RNA. Quantification of NF- $\kappa$ B1 mRNA was performed by using the intron spanning primer (forward primers) 5'-GTGAAGGCCCATCCCATGGT-3' and (reverse primer) 5'-TGTGACCAACTGAACAATAACC-3' resulting in a 122-bp fragment. PCR and primers for the housekeeping gene h $\beta$ -actin were used as described.<sup>12,21</sup> The real-time PCR reaction was performed as described using the Quantitect SYBR Green Kit (Qiagen).<sup>21,22</sup> A complementary DNA dilution series confirmed a PCR efficiency greater than 95%, which was comparable to the efficiency of h $\beta$ -actin. Relative NF- $\kappa$ B1 mRNA expression was measured by two-step real-time PCR with h $\beta$ -actin as internal control and calculated as  $2^{-[Ct(NF\kappa B1) - Ct(\beta\text{-Actin})]}$ .

### DNA Genotyping

Genomic DNA of patients was extracted from whole blood using standard methods (QIAamp, Qiagen). Genotypes of the insertion-deletion polymorphism were determined by pyrosequencing. A 200-bp PCR fragment was amplified using primer *NFKB1\_del/ins\_f* (5'-ATGGAC CGCATGACTCTATCAG-3') and biotinylated primer *NFKB1\_del/ins\_BIO\_r* (5'-GGGGCGCGCGTTAG GCGG-3'). PCR was performed at an annealing temperature of 60°C in a 50- $\mu$ l reaction mixture applying a commercially available PCR master mix (Eppendorf, Hamburg, Germany). Pyrosequencing was performed on a PSQ96 MA (Pyrosequencing, Uppsala, Sweden) using sequencing primer *NFKB1\_del/ins\_seq* (5'-CGTTCCCCGACCAT-3'). Randomly chosen samples were reanalyzed with a different nucleotide injection order for genotype confirmation.

### Materials

Lipopolysaccharide (*Escherichia coli*; serotype 0.111:B4) was obtained from Sigma-Aldrich. Tissue factor standard was obtained from Thrombinoscope BV, Maastricht, Netherlands. Active site-inhibited factor VIIa was a generous gift from Novo Nordisk, Zurich, Switzerland. All other reagents were of analytical grade.

**Thirty-day Mortality in Patients with Severe Sepsis Dependent on the NF- $\kappa$ B1 Promoter Polymorphism (-94ins/delATTG).** This study was reviewed and approved by the ethics committee of the University Hospital Essen. Over a period of 2 yr, 143 patients (93 men and 50 women, mean age: 57  $\pm$  16 yr) admitted to an intensive care unit of the University Hospital of Essen were considered eligible for the study if they fulfilled the criteria for severe sepsis as defined by Bone *et al.*<sup>23</sup> Informed consent was obtained for all patients from the guardian of the patient. Exclusion criteria were age more than 18 yr and no affiliation to the Caucasian ethnicity or no informed consent was obtained. All patients were white Germans of Caucasian ethnicity. Clinical and demographic data on study entry, including Simplified

**Table 1.** Characteristics of Patients with Severe Sepsis at Baseline

| Patient Characteristics At Baseline    | II (n = 68) (48%) | ID/DD (n = 75) (52%) | P Value |
|----------------------------------------|-------------------|----------------------|---------|
| Age (yr; means ± SD)*                  | 56 ± 15           | 60 ± 16              | 0.14    |
| Male/Female ‡                          | 46/22             | 47/28                | 0.53    |
| BMI (kg/m <sup>2</sup> ; means ± SD)*  | 27 ± 5            | 27 ± 6               | 0.99    |
| Cardiovascular disease                 | 17                | 12                   | —       |
| Hemato-oncologic disease               | 2                 | 4                    |         |
| Gastrointestinal disease               | 18                | 26                   |         |
| Gastrointestinal cancer                | 10                | 12                   |         |
| Lung disease                           | 7                 | 11                   |         |
| Lung cancer                            | 2                 | 1                    |         |
| Urogenital disease                     | 1                 | 3                    |         |
| Urogenital cancer                      | 6                 | 3                    |         |
| Skin and fascial infection             | 3                 | 1                    |         |
| Trauma                                 | 2                 | 2                    |         |
| CVVHD, % †                             | 53                | 61                   | 0.41    |
| Mechanical ventilation, % †            | 100               | 100                  | 1.00    |
| C-reactive protein (mg/dl; mean ± SD)* | 14 ± 10           | 14 ± 9               | 0.75    |
| Interleukin 6 (pg/ml; mean ± SD)*      | 654 ± 1,942       | 2,622 ± 12,646       | 0.29    |
| Procalcitonin (ng/ml; mean ± SD)*      | 15 ± 48           | 23 ± 48              | 0.34    |
| SAPS II score (mean ± SD)*             | 46 ± 17           | 49 ± 17              | 0.23    |
| SOFA score (mean ± SD)*                | 11 ± 4            | 13 ± 6               | 0.015   |
| Gram-positive isolates only, %         | 44                | 38                   | —       |
| Gram-negative isolates only, %         | 33                | 32                   |         |
| Mixed bacterial isolates, %            | 11                | 17                   |         |
| Viral isolates, %                      | 0                 | 0                    |         |
| Fungal isolates, %                     | 2                 | 2                    |         |
| Negative cultures, %                   | 10                | 11                   |         |

\* Data are presented as means ± SD and *P* value based on Welch *t* test. † *P* values based on Fisher exact tests. ‡ No statistical test has been applied here.

BMI = body mass index; CVVHD = continuous hemofiltration/dialysis; DD = homozygous deletion genotype; II = homozygous insertion genotype; ID = heterozygous deletion genotype; SAPS II = Simplified Acute Physiology Score; SOFA = Sequential Organ Failure Assessment Score.

Acute Physiology Score II<sup>24</sup> and the Sequential Organ Failure Assessment score,<sup>25</sup> were calculated over the first 24 h after the patient met severe sepsis criteria (table 1). All patients were followed up for 30-day mortality. There were no dropouts from the procedures or data lost in any fashion. Patients were treated with a multimodal concept, which included analgosedation, fluid administration, and protective mechanical ventilation, hemodynamic, antibiotic, and diagnostic management. Continuous hemofiltration/dialysis was initiated and technically performed by the Department of Nephrology according to standardized protocols.

DNA was isolated and genotyped for the *NFKB1* promoter polymorphism (−94ins/delATTG) as described in DNA Genotyping.

### Data Analysis and Statistics

After incubation, the percentage of nuclear NFκB-positive cells was normalized to the percentage of nuclear NFκB-positive cells in unstimulated controls. The Kolmogorov–Smirnov test and Shapiro–Wilk normality test revealed a

normal distribution for nuclear NFκB-positive cells, and the Student *t* test for unpaired samples was used to analyze differences between groups. Semiquantitative analysis was performed using the Graphpad Prism 5 statistics program (Graph Pad Software, San Diego, CA).

To test the effect of the *NFKB1* promoter polymorphism (−94ins/delATTG) on NF-κB1 mRNA expression, TNFα concentration, and tissue factor activity after lipopolysaccharide stimulation, heterozygous deletion (ID) and DD genotypes were combined and then tested against the II genotype, because there were only five volunteers with the DD genotype. Potential deviation from the Hardy–Weinberg equilibrium was tested with the statistic program Excel of Microsoft Office 2010 (Microsoft Deutschland, Unterschleißheim, Germany).

Statistical analyses were performed using two-way ANOVA followed by *post hoc* testing with Bonferroni Holm, respectively, using SPSS 13.0 (SPSS, Chicago, IL) or Graphpad Prism 5.0. Data are presented as mean and standard error or SD of the mean, as indicated. For the determination

**Table 2.** Cox Regression Analyses in Patients with Severe Sepsis

| (Co) Variable                                                       | Multivariate             |                |                          |                |                          |                |
|---------------------------------------------------------------------|--------------------------|----------------|--------------------------|----------------|--------------------------|----------------|
|                                                                     | Univariate               |                | Initial                  |                | Restricted               |                |
|                                                                     | Hazard Ratio<br>(95% CI) | <i>P</i> Value | Hazard Ratio<br>(95% CI) | <i>P</i> Value | Hazard Ratio<br>(95% CI) | <i>P</i> Value |
| NFKB1 genotype                                                      |                          |                |                          |                |                          |                |
| II                                                                  | 1                        | —              | 1                        | —              | 1                        | —              |
| ID/DD                                                               | 1.4 (1.03–1.9)           | 0.039          | 2.33 (1.11–4.86)         | 0.025          | 2.33 (1.13–4.80)         | 0.022          |
| Sex                                                                 |                          |                |                          |                |                          |                |
| Female                                                              | 1                        | —              | 1                        | —              |                          |                |
| Male                                                                | 0.87 (0.66–1.4)          | 0.318          | 1.41 (0.68–2.96)         | 0.36           |                          |                |
| Age (per 5 yr)                                                      | 0.99 (0.91–1.09)         | 0.898          | 0.97 (0.97–1.02)         | 0.81           |                          |                |
| SAPS II score (per U)                                               | 1.03(1.01–1.05)          | 0.010          | 1.02(0.99–1.05)          | 0.28           | 1.08 (0.98–1.03)         | 0.665          |
| SOFA score (per U)                                                  | 1.04(0.99–1.08)          | 0.132          | 0.96(0.88–1.10)          | 0.39           |                          |                |
| Requirement of continuous hemofiltration/dialysis                   |                          |                |                          |                |                          |                |
| No                                                                  | 1                        | —              | 1                        | —              | 1                        | —              |
| Yes                                                                 | 3.32 (1.53–7.23)         | 0.003          | 3.29 (1.30–8.29)         | 0.12           | 3.4 (1.38–8.22)          | 0.008          |
| C-reactive protein concentration<br>(per log <sub>10</sub> [mg/dl]) | 0.84 (0.44–1.64)         | 0.618          | 0.98 (0.94–1.03)         | 0.59           |                          |                |
| Interleukin 6 concentration<br>(per log <sub>10</sub> [pg/ml])      | 2.06 (1.48–2.85)         | <0.001         | 1.0 (1.0–1.0)            | 0.26           | 1.0 (1.0–1.0)            | 0.38           |
| Procalcitonin concentration<br>(per log <sub>10</sub> [ng/ml])      | 1.39 (0.96–2.01)         | 0.085          | 1.0 (0.99–1.01)          | 0.42           |                          |                |

Hazard ratio point estimates, 95% CIs, and *P* values (two-sided) from Wald tests are reported.

DD = homozygous deletion genotype; ID = heterozygous deletion genotype; II = homozygous insertion genotype; SAPS II = Simplified Acute Physiology Score; SOFA = Sequential Organ Failure Assessment Score.

of tissue factor concentrations from clotting time, a four-parameter Hill function was used for the curve fit (SigmaPlot Software, San Jose, CA).

The *NFKB1* promoter polymorphism (–94ins/delATTG) genotype distributions were tested for deviations from Hardy–Weinberg equilibrium (exact two-sided *P* value 1.00) in the sepsis cohort. Explorative comparisons by *NFKB1* promoter polymorphism (–94ins/delATTG) genotypes (ID/DD *vs.* II) were performed for several clinical characteristics of the sepsis patients (table 1). ID and DD were combined because of the low frequency of the DD genotype.

The clinical endpoint was survival over the first 30 days dependent on *NFKB1* promoter polymorphism (–94ins/delATTG) genotypes. Survival probabilities were graphically assessed by the Kaplan–Meier method, and the log-rank test was used to evaluate the univariate relationship between *NFKB1* genotypes and clinical outcome. Thereafter, we performed multivariate Cox regression analyses to assess the joint impact of *NFKB1* promoter polymorphism (–94ins/delATTG) genotypes, sex, age, Simplified Acute Physiology Score II, Sequential Organ Failure Assessment score, requirement of continuous hemofiltration/dialysis, C-reactive protein, and interleukin 6 concentration as predictors for the clinical outcome (30-day survival). Model diagnostic of the proportional-hazards assumption

for the *NFKB1* promoter polymorphism (–94ins/delATTG) genotypes comprised both graphical and formal investigations—none of which indicated strong evidence for a deviation from the proportional-hazards assumption. The multivariate analyses included two steps with a focus on *NFKB1* promoter polymorphism (–94ins/delATTG) genotypes and 30-day survival. In the initial model, all main effects were simultaneously investigated (table 2). To avoid overfitting, a restricted model with only four variables was assessed afterward using only those predictors with a *P* value ≤0.05 in either the univariate or the initial multivariate comparison (table 2).

CIs were calculated with coverage of 95% (abbreviated 95% CI). All reported *P* values are nominal, two-sided, and we applied a significance level  $\alpha$  of 5%.

## Results

### *Nuclear Translocation of NF- $\kappa$ B1 in Monocytes after Lipopolysaccharide Stimulation According to the NFKB1 Promoter Polymorphism (–94ins/delATTG)*

After lipopolysaccharide stimulation, the DD genotype was associated with a 5.5-fold ( $\pm$  2.9 SD) increase in nuclear NF $\kappa$ B-positive cells normalized to controls (incubation with vehicle), compared with a 2.8-fold ( $\pm$ 0.9 SD) increase in II genotype (*P* = 0.001, fig. 1).

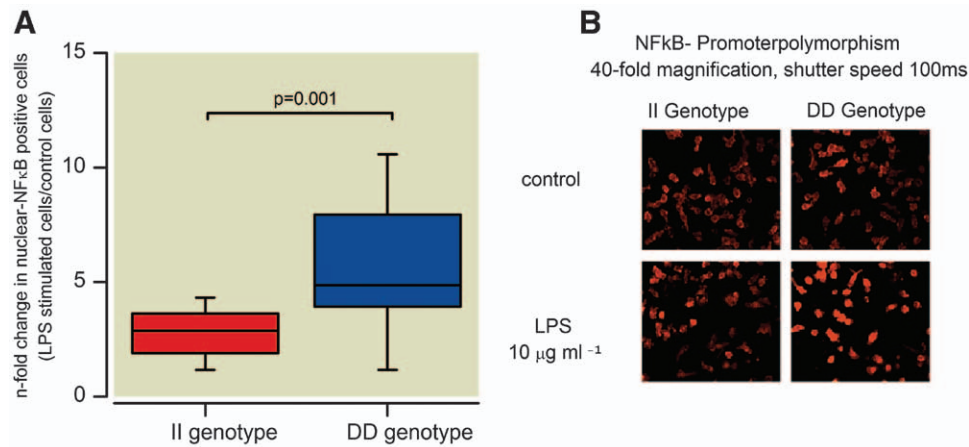

**Fig. 1.** A, The *NFKB1* promoter polymorphism (−94ins/delATTG) alters nuclear translocation of nuclear factor-κB and activator protein-1 (NF-κB1) in monocytes after LPS stimulation. B, Nuclear translocation of NF-κB1 in monocytes after lipopolysaccharide stimulation as visualized with immunofluorescence staining. The DD genotype was associated with a twofold increase in nuclear NFκB-positive cells compared with the II genotype. DD = homozygous deletion; II = homozygous insertion; LPS = lipopolysaccharide.

#### **NF-κB1 mRNA Expression, TNF $\alpha$ Concentration, and Tissue Factor Activity after Lipopolysaccharide Stimulation According to the *NFKB1* Promoter Polymorphism (−94ins/delATTG)**

##### **Lipopolysaccharide-induced Expression of NF-κB1 mRNA.**

NF-κB1/actin mRNA ratios were determined in the absence and presence of lipopolysaccharide (225  $\mu\text{g}/\text{ml}$ ). The mRNA for NF-κB1 increased nearly threefold from  $0.013 \pm 0.025$  to  $0.034 \pm 0.025$  ( $P = 0.002$ ) on lipopolysaccharide stimulation (fig. 2). Moreover, the NF-κB1/actin ratio was

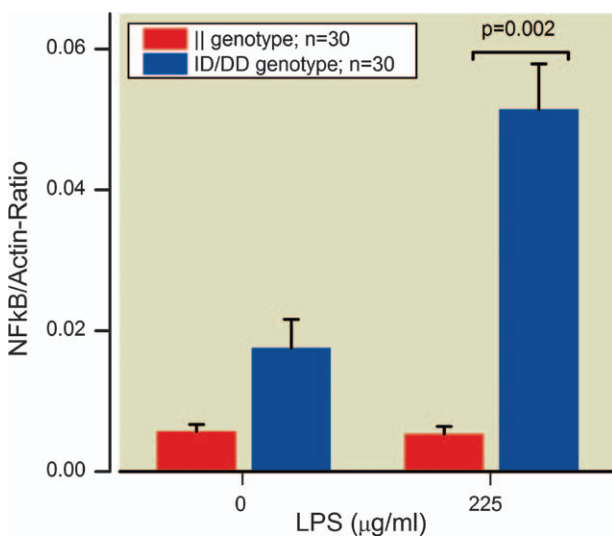

**Fig. 2.** Effect of the *NFKB1* polymorphism on the expression of the transcription factor NF-κB1 in the absence and presence of lipopolysaccharide. The LPS (225  $\mu\text{g}/\text{ml}$ )–induced increase in NF-κB1 messenger RNA was markedly higher in volunteers with the deletion allele (ID/DD) compared with the II genotype. Data are the means  $\pm$  SEM. DD = homozygous deletion; ID = heterozygous deletion; II = homozygous insertion; LPS = lipopolysaccharide.

markedly associated with genotypes. As shown in figure 2, lipopolysaccharide-induced expression of NF-κB1 was three times as high in the presence of the deletion allele compared with the homozygote II genotype ( $0.018 \pm 0.015$  vs.  $0.051 \pm 0.001$ ,  $P = 0.0001$ ). In the absence of lipopolysaccharide, NF-κB1 expression was not associated with genotypes.

##### **Effects of Lipopolysaccharide on Whole Blood Clotting Time.**

Clotting time was determined in 105 volunteers both in the absence of lipopolysaccharide and after 4 h of incubation with lipopolysaccharide. Lipopolysaccharide shortened the clotting time in a concentration-dependent manner from  $612 \pm 10$  to  $325 \pm 10$  s (25  $\mu\text{g}/\text{ml}$  lipopolysaccharide),  $282 \pm 10$  s (75  $\mu\text{g}/\text{ml}$  lipopolysaccharide), and  $220 \pm 8$  s (225  $\mu\text{g}/\text{ml}$  lipopolysaccharide), respectively.

##### **Effects of the *NFKB1* Insertion–Deletion Polymorphism on Clotting Time.**

Determination of *NFKB1* genotypes revealed 42 subjects homozygous for the insertion allele, 45 were heterozygous, and 5 were homozygous for the deletion allele. As shown in figure 3, the clotting times of II and combined deletion allele carriers were not different in the absence of lipopolysaccharide ( $618 \pm 17$  vs.  $607 \pm 15$  s;  $P = 0.58$ ). After stimulation with lipopolysaccharide, however, the deletion allele overall lipopolysaccharide stimulation concentrations were associated with a 20% lower clotting time compared with the II genotype (25  $\mu\text{g}/\text{ml}$ ,  $P = 0.047$ ; 75  $\mu\text{g}/\text{ml}$ ,  $P = 0.003$ ; and 225  $\mu\text{g}/\text{ml}$ ,  $P = 0.021$ ). Neither maximum clot formation nor clot formation time was associated with genotypes (data not shown).

##### **Mechanism of the Lipopolysaccharide-induced Shortening of Clotting Time.**

To unravel the mechanism underlying the lipopolysaccharide-induced shortening of clotting time, the effects of the protein synthesis inhibitor cycloheximide and of the tissue factor inhibitor, active site–inhibited factor seven, were determined. Both drugs abolished the effect of lipopolysaccharide on clotting time, demonstrating that

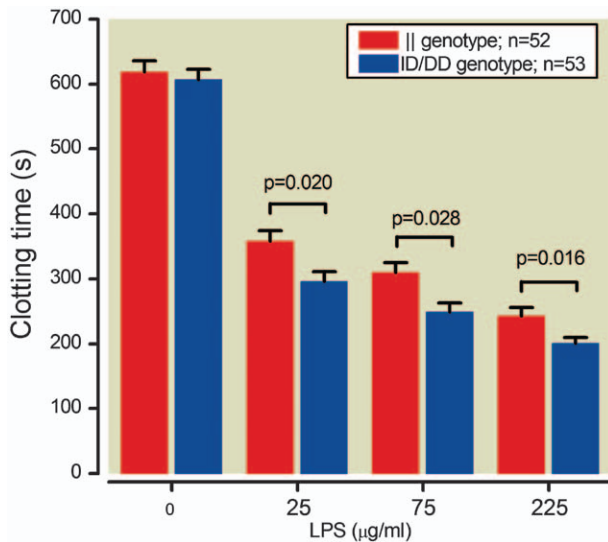

**Fig. 3.** Effects of the NFKB1 genotypes on whole blood clotting time induced by LPS. Whole blood samples were incubated with LPS (0, 25, 75, 225 µg/ml) for 4 h at 37°C. Thereafter, clotting time was determined by thromboelastometry. LPS evoked a concentration-dependent shortening of clotting time, which was markedly affected by the genotype. Data are shown as means ± SEM, and statistical significances between genotypes are indicated by *P* values. Combined ID/DD genotypes and II genotype. DD = homozygous deletion; ID = heterozygous deletion; II = homozygous insertion; LPS = lipopolysaccharide.

lipopolysaccharide exerts its effect *via de novo* protein synthesis of tissue factor (fig. 4).

**Tissue Factor Concentration and Whole Blood Clotting Time.** To determine the biologically active tissue factor concentration responsible for the observed

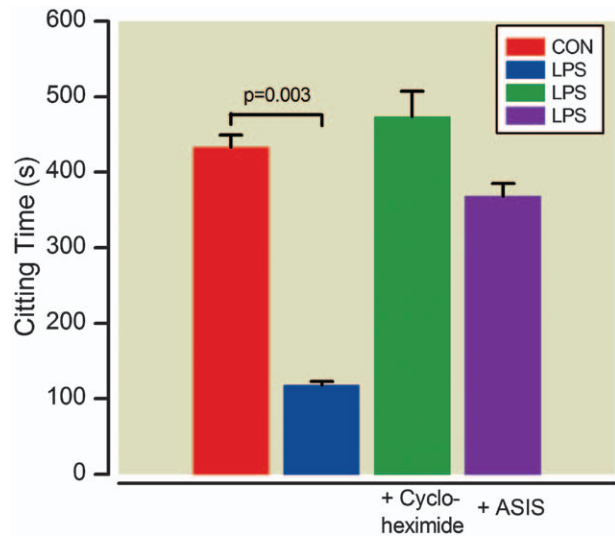

**Fig. 4.** Influence of protein synthesis inhibition (cycloheximide 35 µM) and tissue factor blockade ASIS (50 µg/ml) on LPS (225 µg/ml)-induced shortening of clotting time. The lipopolysaccharide effect was abolished by protein synthesis inhibition or tissue factor blockade. In the absence of lipopolysaccharide, cycloheximide and active site-inhibited factor seven had no effect on clotting time. Data from six volunteers are the means ± SEM. Statistical significance of the lipopolysaccharide-evoked shortening of clotting time is indicated by *P* values. Controls (CON). ASIS = active site-inhibited factor seven; LPS = lipopolysaccharide.

lipopolysaccharide-induced shortening of clotting time, a concentration response curve was constructed using tissue factor standards. As shown in figure 5A, exogenous tissue factor shortened the clotting time over a broad concentration range from 20 fM to 20 pM. Correlation by nonlinear

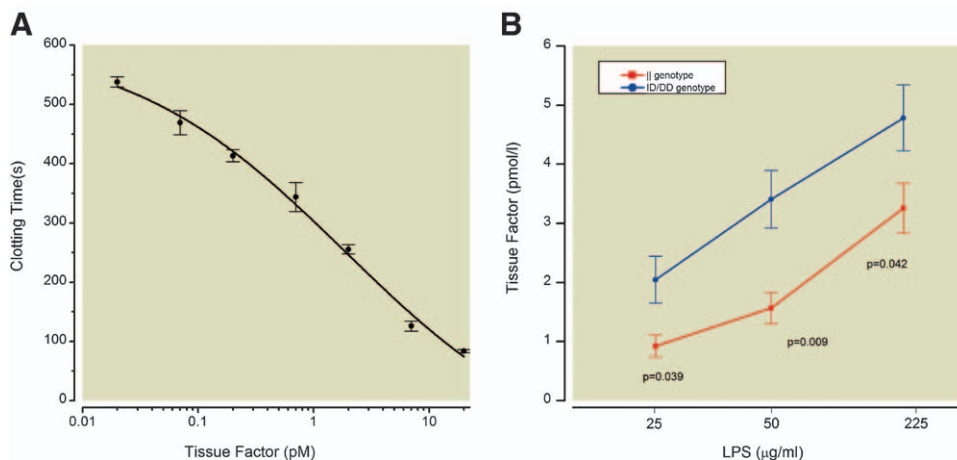

**Fig. 5.** A, Concentration response curve of tissue factor standards on whole blood clotting time. Tissue factor shortened clotting time in a concentration-dependent fashion. Data from six volunteers are the means ± SEM. Clotting time was significantly shortened by tissue factor at all concentrations tested (*P* < 0.05). B, Effects of the NFKB1 polymorphism on the tissue factor concentration in whole blood samples incubated with LPS. Compared with the II genotype, the deletion allele (ID/DD) shifted the dose-response curve to fourfold lower LPS concentrations. Values are depicted as means ± SEM. Statistical significance of lipopolysaccharide-induced shortening of clotting time is indicated by *P* values in the figure. DD = homozygous deletion; ID = heterozygous deletion; II = homozygous insertion; LPS = lipopolysaccharide.

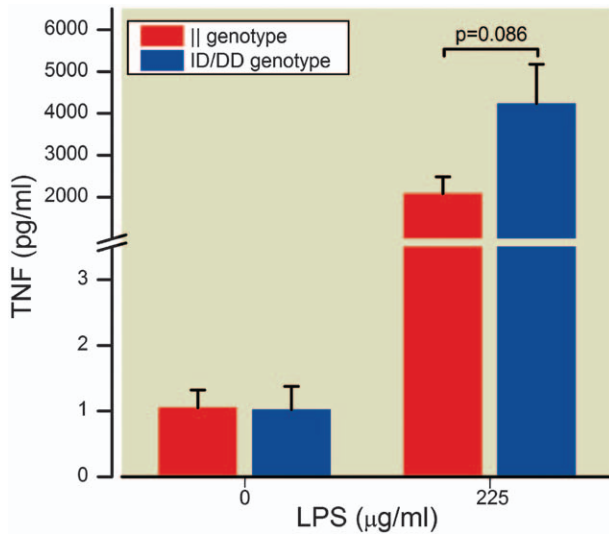

**Fig. 6.** Effect of the *NFKB1* insertion–deletion polymorphism on the plasma concentration of TNF $\alpha$ . Whole blood samples were incubated with LPS 225  $\mu$ g/ml or vehicle for 4 h. Thereafter, TNF $\alpha$  was determined in plasma. Data are the means  $\pm$  SEM, *P* values are given in the figure. II genotype, combined ID/DD genotypes. DD = homozygous deletion; ID = heterozygous deletion; II = homozygous insertion; LPS = lipopolysaccharide; TNF = tumor necrosis factor.

regression analysis in six experiments using a four-parameter Hill function was 0.98. Figure 5B depicts the effects of the genotypes of the *NFKB1* insertion–deletion polymorphism on tissue factor concentration in the presence of lipopolysaccharide as calculated from the standard curve shown in figure 5A. In comparison to the homozygous II genotype, the lipopolysaccharide-induced tissue factor concentration was two- to three-fold increased in the presence of the deletion allele (25  $\mu$ g/ml, *P* = 0.039; 75  $\mu$ g/ml, *P* = 0.003; and 225  $\mu$ g/ml, *P* = 0.021; fig. 5B)

**TNF $\alpha$  Plasma Concentration.** Because TNF $\alpha$  release is affected by the activity of NF- $\kappa$ B1, we determined the effect of lipopolysaccharide on the concentration of this cytokine (fig. 6). Lipopolysaccharide (225  $\mu$ g/ml) increased the TNF $\alpha$  concentration more than 1,000-fold (*P* < 0.001). The effect of lipopolysaccharide was not modulated by the genotypes of the *NFKB1* promoter polymorphism, because testing with a two-way ANOVA after *post hoc* testing with Bonferroni Holm revealed a *P* value of 0.08. In addition, in the absence of lipopolysaccharide, TNF $\alpha$  concentrations were not different.

**Thirty-day Mortality in Patients with Severe Sepsis According to the *NFKB1* Promoter Polymorphism (–94ins/delATTG).** Thirty-day mortality was significantly associated with *NFKB1* insertion–deletion (–94ins/delATTG) polymorphism genotypes (*P* = 0.034). Mortality was 25% for II genotypes but 41% for combined ID/DD genotypes (fig. 7). ID/DD genotypes displayed a significantly higher risk for death than patients with homozygous II genotypes (hazard ratio, 1.4; 95% CI, 1.03–1.9; *P* = 0.034).

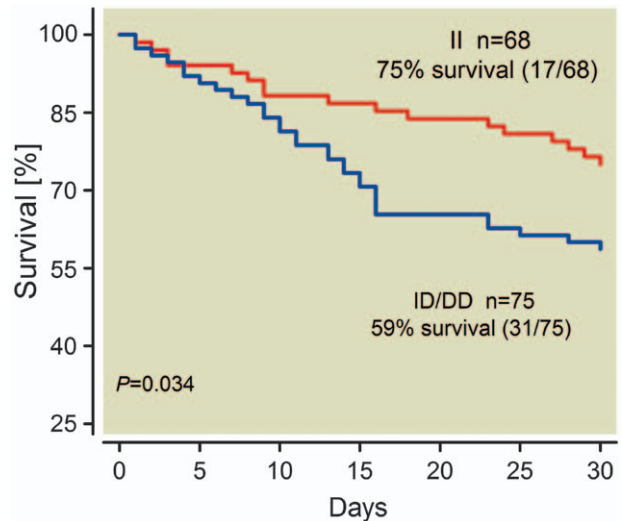

**Fig. 7.** Kaplan–Meier plot of 30-day mortality of patients with severe sepsis dependent on the *NFKB1* insertion–deletion promoter polymorphism (–94ins/delATTG). Mortality was 25% for II genotypes but 41% for combined ID/DD genotypes (*P* = 0.034). DD = homozygous deletion; ID = heterozygous deletion; II = homozygous insertion.

Multivariate proportional hazard analysis, including sex, age, Sequential Organ Failure Assessment score, Simplified Acute Physiology Score II, procalcitonin, C-reactive protein, or interleucin-6 concentrations, and requirement for continuous hemofiltration/dialysis as covariates revealed the *NFKB1* insertion–deletion (–94ins/delATTG) polymorphism as an important and independent prognostic factor for 30-day mortality. ID/DD genotypes had an almost twofold greater risk for death (hazard ratio, 2.3; 95% CI, 1.13–4.8; *P* = 0.022) compared with II genotypes (table 2).

The requirement of continuous hemofiltration/dialysis was also an independent and strong prognostic factor for 30-day survival (hazard ratio, 3.4; 95% CI, 1.38–8.22; *P* = 0.008). Genotype frequencies and the clinical characteristics of the patients grouped by *NFKB1* insertion–deletion (–94ins/delATTG) polymorphism genotypes are displayed in table 1. We found no significant associations of *NFKB1* insertion–deletion (–94ins/delATTG) polymorphism genotypes with sex, age, body mass index, procalcitonin, C-reactive protein, or interleucin-6 concentrations, necessity for continuous hemofiltration/dialysis, type of infection, or primary diagnosis at hospital admission. In contrast, the *NFKB1* insertion–deletion (–94ins/delATTG) polymorphism was associated with a genotype-dependent increase of the Sequential Organ Failure Assessment score (*P* = 0.015) (table 1). The deletion allele carriers had higher Sequential Organ Failure Assessment score compared with the II genotype carriers.

## Discussion

Our study shows for the first time that the ID/DD genotypes of the *NFKB1* insertion–deletion (–94ins/delATTG)



polymorphism are significantly associated with markedly increased 30-day mortality in patients with severe sepsis. In addition, our study unravels the molecular mechanism by which the D allele may amplify and perpetuate inflammatory mechanism prevailing in sepsis.

Genotypes of the *NFKB1* insertion–deletion (–94ins/delATTG) polymorphism turned out to represent both an important and independent prognostic factor for 30-day mortality. The hazard ratio of 2.3 not only suggests that the D allele of the *NFKB1* insertion–deletion (–94ins/delATTG) polymorphism has important effects on NF- $\kappa$ B1 expression but also underscores the potential relevance of NF- $\kappa$ B1 expression in severe sepsis. Because wide variability exists regarding the outcome in sepsis,<sup>1,26</sup> part of this variability may be explained by the genetic variation in the promoter of *NFKB1*.

In addition, our results show that the D allele is also associated with initial disease severity, because it was associated with an increased Sequential Organ Failure Assessment score. These findings are in accordance with our previous investigation, showing that the deletion allele of this polymorphism was also associated with increased severity of adult respiratory distress syndrome.<sup>12</sup>

Of note, this study unravels molecular mechanism by which the D allele of the *NFKB1* insertion–deletion (–94ins/delATTG) polymorphism seems to amplify and perpetuate inflammatory mechanism prevailing in sepsis, which may consecutively influence severity and mortality of severe sepsis. The DD genotype of the *NFKB1* insertion–deletion (–94ins/delATTG) polymorphism is associated with increased nuclear translocation of NF- $\kappa$ B1.

This also suggests that increased nuclear translocation of NF- $\kappa$ B alters the expression of various genes involved in the inflammatory response such as cytokines or the hypoxia inducible factor 1  $\alpha$ . Hypoxia inducible factor 1  $\alpha$ , a well-characterized NF- $\kappa$ B target, is the key regulator linking inflammatory and hypoxic signaling pathways.<sup>27</sup> Therefore, polymorphisms of the NF- $\kappa$ B1 gene play a pivotal role in mediating both an excessive inflammatory response in humans and an induction of the hypoxic signaling. Thus, a variety of pathways are altered, resulting in disturbed vascular tone or cellular adhesion and changes in cellular receptor expression that, in concert, are likely to be associated with an unfavorable outcome.<sup>28</sup>

Because NF- $\kappa$ B1 binds to recognition elements in the promoter regions of inflammatory genes, it can be speculated that the D allele potentially alters the consequences of sepsis *via* the coordinated activation of several inflammatory genes of the innate and adaptive immunity. However, NF- $\kappa$ B1 also influences the coagulation system *via* tissue factor. During sepsis, tissue factor is highly expressed on monocytes, resulting in disseminated intravascular coagulation, ischemia, and organ dysfunction.<sup>29,30</sup> In the current study, we also show for the first time that lipopolysaccharide-induced tissue factor expression was affected by the D allele of the *NFKB1*

promoter polymorphism. As the development of disseminated intravascular coagulation, which is mediated by tissue factor expression, is an independent risk factor in sepsis, it can be speculated that the deletion allele may also affect the course of sepsis *via* increased tissue factor expression.

In the current study, whole blood from volunteers was incubated with lipopolysaccharide *in vitro* to investigate the effects of the *NFKB1* promoter polymorphism on toll-like receptor 4 agonist-evoked responses under well-controlled conditions. Specificity of our clotting assay for tissue factor was demonstrated by the use of active site–inhibited factor seven, because the lipopolysaccharide-induced shortening of clotting time was abolished in presence of this inhibitor. We decided to determine clotting time as a measure of tissue factor using thromboelastometry instead of protein, because this functional assay has several important advantages compared with other tissue factor assays.<sup>31,32</sup> The sensitivity of our clotting assay is high, because lipopolysaccharide-induced tissue factor in whole blood samples exceeds the detection limit of the assay more than 100-fold. Furthermore, the functional assay measures biologically relevant tissue factor activity on the surface of intact cells. In contrast, measurements in homogenates, which are commonly used for enzyme-linked immunosorbent assay, also determine the functionally irrelevant intracellular tissue factor.<sup>31,33,34</sup> Moreover, enzyme-linked immunosorbent assay and chromogenic assays, but not a clotting assay, may also detect soluble tissue factor, which is believed to be of minor physiologic relevance.<sup>31,33,34</sup> Tissue factor concentration was calculated from clotting time using a calibration curve obtained by the addition of tissue factor standard to whole blood samples. In theory, this method might be influenced by a direct effect of the *NFKB1* genotypes on platelets or coagulation factors. However, no differences in platelet count or coagulation factor activity was detected, as judged by clot firmness using thromboelastometry.

Because of the study design, the question arises, whether the lipopolysaccharide concentration used in our *in vitro* experiments is of clinical relevance. To study biological effects, lipopolysaccharide has been used in a wide concentration range covering the ng/ml up to the mg/ml range. In most whole blood studies, lipopolysaccharide ranged from  $\mu$ g/ml to mg/ml.<sup>35–38</sup> In contrast, most cell culture studies were performed with lipopolysaccharide concentrations in the ng/ml range,<sup>38–40</sup> that is, concentrations much lower in comparison to whole blood. The use of these different concentration ranges can be explained by the physicochemical properties of the lipopolysaccharide molecule. Lipopolysaccharide, as an amphiphilic molecule in biological fluids, is always bound to other molecules such as peptides and proteins.<sup>41</sup> It is well recognized that human plasma neutralizes lipopolysaccharide up to 6  $\mu$ g/ml<sup>42</sup> and that lipopolysaccharide diluted in plasma before application is less effective than lipopolysaccharide diluted in crystalloid solution.<sup>43,44</sup> Accordingly, we used 10  $\mu$ g/ml for the cell culture studies

and 225  $\mu$ g/ml lipopolysaccharide for the measurements of NFKB1 mRNA expression and TNF $\alpha$  protein concentration in whole blood, respectively. In our study, the EC<sub>50</sub> for the lipopolysaccharide-induced activation of coagulation was 18  $\mu$ g/ml. The EC<sub>50</sub> of lipopolysaccharide in our *ex vivo* assay can also be achieved by intravenous administration of a 2-mg/kg dose of lipopolysaccharide if an intravascular volume of 10% of the body weight is assumed. Notably, this lipopolysaccharide dosage was used in primates,<sup>45,46</sup> and injection of 1 mg lipopolysaccharide has been described in humans.<sup>47</sup>

Limitations of this investigation should also be mentioned. Unrecognized selection bias, inherent to many genetic association studies, cannot ultimately be excluded. Moreover, although all sepsis patients were treated with a rather standardized multimodal regimen, because of the multifactorial nature of this disorder, we cannot exclude that unknown potentially confounding factors exist. Nevertheless, the study population was rather large, and multivariate proportional hazard analysis revealed the *NFKB1* insertion-deletion (-94ins/delATTG) polymorphism to be an important and strong independent prognostic factor for survival. This underscores the potential relevance of NF- $\kappa$ B1 expression in severe sepsis, regardless even of mechanisms involved.

In conclusion, after lipopolysaccharide stimulation, the D allele of the *NFKB1* insertion-deletion (-94ins/delATTG) polymorphism is associated with increased nuclear translocation of NF- $\kappa$ B1, boosted coagulation, and increased 30-day mortality in patients with severe sepsis. Accordingly, part of the variability in the outcome may be explained by the genetic variation in the promoter of *NFKB1* and its molecular consequences mediated by altered nuclear translocation of NF- $\kappa$ B1.

## References

- Adamzik M, Frey UH, Möhlenkamp S, Scherag A, Waydhas C, Marggraf G, Dammann M, Steinmann J, Siffert W, Peters J: Aquaporin 5 gene promoter-1364A/C polymorphism associated with 30-day survival in severe sepsis. *ANESTHESIOLOGY* 2011; 114:912-7
- Ma P, Zhu Y, Qiu H, Liu J, Wang Y, Zeng L: Endothelial nitric oxide synthase 894G→T but not -786T→C gene polymorphism is associated with organ dysfunction and increased mortality in patients with severe sepsis. *J Trauma* 2011; 71:872-7
- Thair SA, Walley KR, Nakada TA, McConechy MK, Boyd JH, Wellman H, Russell JA: A single nucleotide polymorphism in NF- $\kappa$ B inducing kinase is associated with mortality in septic shock. *J Immunol* 2011; 186:2321-8
- Abraham E: NF- $\kappa$ B activation. *Crit Care Med* 2000; 28:100-4
- Cao L, Qian LL, Zhu YR, Guo CB, Gong XH, Sun B: Regulation of activity of nuclear factor- $\kappa$ B and activator protein-1 by nitric oxide, surfactant and glucocorticoids in alveolar macrophages from piglets with acute lung injury. *Acta Pharmacol Sin* 2003; 24:1316-23
- Blackwell TS, Christman JW: The role of nuclear factor- $\kappa$ B in cytokine gene regulation. *Am J Respir Cell Mol Biol* 1997; 17:3-9
- Browder W, Ha T, Chuanfu L, Kalbfleisch JH, Ferguson DA, Williams DL: Early activation of pulmonary nuclear factor  $\kappa$ B and nuclear factor interleukin-6 in polymicrobial sepsis. *J Trauma* 1999; 46:590-6
- Levi M, van der Poll T, ten Cate H: Tissue factor in infection and severe inflammation. *Semin Thromb Hemost* 2006; 32:33-9
- Levi M, Ten Cate H: Disseminated intravascular coagulation. *N Engl J Med* 1999; 341:586-92
- Barnes PJ, Karin M: Nuclear factor- $\kappa$ B: A pivotal transcription factor in chronic inflammatory diseases. *N Engl J Med* 1997; 336:1066-71
- Karban AS, Okazaki T, Panhuysen CI, Gallegos T, Potter JJ, Bailey-Wilson JE, Silverberg MS, Duerr RH, Cho JH, Gregersen PK, Wu Y, Achkar JP, Dassopoulos T, Mezey E, Bayless TM, Nougat FJ, Brant SR: Functional annotation of a novel NFKB1 promoter polymorphism that increases risk for ulcerative colitis. *Hum Mol Genet* 2004; 13:35-45
- Adamzik M, Frey UH, Riemann K, Sixt S, Beiderlinden M, Siffert W, Peters J: Insertion/deletion polymorphism in the promoter of NFKB1 influences severity but not mortality of acute respiratory distress syndrome. *Intensive Care Med* 2007; 33:1199-203
- Adamzik M, Schaefer S, Frey UH, Becker A, Kreutzer M, Winning S, Frede S, Steinmann J, Fandrey J, Zacharowski K, Siffert W, Peters J, Hartmann M: The NFKB1 promoter polymorphism (94ins/delATTG) alters nuclear translocation of NF- $\kappa$ B1 in monocytes following lipopolysaccharide stimulation and is associated with increased mortality in sepsis. *Infection* 2011; 39:S101-2
- Berchner-Pfannschmidt U, Yamac H, Trinidad B, Fandrey J: Nitric oxide modulates oxygen sensing by hypoxia-inducible factor 1-dependent induction of prolyl hydroxylase 2. *J Biol Chem* 2007; 282:1788-96
- Hartmann M, Ozlügedik S, Peters J: Thiopental inhibits lipopolysaccharide-induced tissue factor expression. *Anesth Analg* 2009; 109:109-13
- Sucker C, Zacharowski K, Thielmann M, Hartmann M: Heat shock inhibits lipopolysaccharide-induced tissue factor activity in human whole blood. *Thromb J* 2007; 5:13
- Hartert H: [Thrombelastography, a method for physical analysis of blood coagulation]. *Z Gesamte Exp Med* 1951; 117:189-203
- Bischof D, Dalbert S, Zollinger A, Ganter MT, Gantner MT, Hofer CK: Thrombelastography in the surgical patient. *Minerva Anestesiologia* 2010; 76:131-7
- Ganter MT, Hofer CK: Coagulation monitoring: Current techniques and clinical use of viscoelastic point-of-care coagulation devices. *Anesth Analg* 2008; 106:1366-75
- Zacharowski K, Zacharowski PA, Koch A, Baban A, Tran N, Berkels R, Papewalis C, Schulze-Osthoff K, Knuefermann P, Zähringer U, Schumann RR, Rettori V, McCann SM, Bornstein SR: Toll-like receptor 4 plays a crucial role in the immune-adrenal response to systemic inflammatory response syndrome. *Proc Natl Acad Sci USA* 2006; 103:6392-7
- Riemann K, Becker L, Struwe H, Nüchel H, Dührsen U, Alakus H, Winde G, Neuhäuser M, Rübber H, Schmitz KJ, Wohlschlaeger J, Schmid KW, Siffert W: No association of the NFKB1 insertion/deletion promoter polymorphism with survival in colorectal and renal cell carcinoma as well as disease progression in B-cell chronic lymphocytic leukemia. *Pharmacogenet Genomics* 2006; 16:783-8
- Riemann K, Becker L, Struwe H, Rübber H, Eisenhardt A, Siffert W: Insertion/deletion polymorphism in the promoter of NFKB1 as a potential molecular marker for the risk of recurrence in superficial bladder cancer. *Int J Clin Pharmacol Ther* 2007; 45:423-30
- Bone RC, Sprung CL, Sibbald WJ: Definitions for sepsis and organ failure. *Crit Care Med* 1992; 20:724-6
- Le G, Lemeshow S, Saulniervens-namesF: A new Simplified Acute Physiology Score (SAPS II) based on a European/North American multicenter study. *JAMA* 1993; 270:2957-63

25. Ferreira FL, Bota DP, Bross A, Mélot C, Vincent JL: Serial evaluation of the SOFA score to predict outcome in critically ill patients. *JAMA* 2001; 286:1754–8
26. Gu W, Zeng L, Zhang LY, Jiang DP, Du DY, Hu P, Wang HY, Liu Q, Huang SN, Jiang JX: Association of interleukin 4 -589T/C polymorphism with T(H)1 and T(H)2 bias and sepsis in Chinese major trauma patients. *J Trauma* 2011; 71:1583–7
27. Eltzschig HK, Carmeliet P: Hypoxia and inflammation. *N Engl J Med* 2011; 364:656–65
28. Kuhlicke J, Frick JS, Morote-Garcia JC, Rosenberger P, Eltzschig HK: Hypoxia inducible factor (HIF)-1 coordinates induction of Toll-like receptors TLR2 and TLR6 during hypoxia. *PLoS ONE* 2007; 2:e1364
29. Hotchkiss RS, Swanson PE, Freeman BD, Tinsley KW, Cobb JP, Matuschak GM, Buchman TG, Karl IE: Apoptotic cell death in patients with sepsis, shock, and multiple organ dysfunction. *Crit Care Med* 1999; 27:1230–51
30. Levi M, Keller TT, van Gorp E, ten Cate H: Infection and inflammation and the coagulation system. *Cardiovasc Res* 2003; 60:26–39
31. Park MS, Martini WZ, Dubick MA, Salinas J, Butenas S, Kheirabadi BS, Pusateri AE, Vos JA, Guymon CH, Wolf SE, Mann KG, Holcomb JB: Thromboelastography as a better indicator of hypercoagulable state after injury than prothrombin time or activated partial thromboplastin time. *J Trauma* 2009; 67:266–75; discussion 275–6
32. Zacharowski K, Sucker C, Zacharowski P, Hartmann M: Thrombelastography for the monitoring of lipopolysaccharide induced activation of coagulation. *Thromb Haemost* 2006; 95:557–61
33. Butenas S, Orfeo T, Mann KG: Tissue factor in coagulation: Which? Where? When? *Arterioscler Thromb Vasc Biol* 2009; 29:1989–96
34. Butenas S, Mann KG: Active tissue factor in blood? *Nat Med* 2004; 10:1155–6; author reply 1156
35. Nootboom A, Van Der Linden CJ, Hendriks T: Tumor necrosis factor- $\alpha$  and interleukin-1 $\beta$  mediate endothelial permeability induced by lipopolysaccharide-stimulated whole blood. *Crit Care Med* 2002; 30:2063–8
36. Nootboom A, Bleichrodt RP, Hendriks T: Modulation of endothelial monolayer permeability induced by plasma obtained from lipopolysaccharide-stimulated whole blood. *Clin Exp Immunol* 2006; 144:362–9
37. Ziegler-Heitbrock HW, Wedel A, Schraut W, Ströbel M, Wendelgass P, Sternsdorf T, Bäuerle PA, Haas JG, Riethmüller G: Tolerance to lipopolysaccharide involves mobilization of nuclear factor  $\kappa$ B with predominance of p50 homodimers. *J Biol Chem* 1994; 269:17001–4
38. Pöschl JM, Leray C, Ruef P, Cazenave JP, Linderkamp O: Endotoxin binding to erythrocyte membrane and erythrocyte deformability in human sepsis and *in vitro*. *Crit Care Med* 2003; 31:924–8
39. Spolarics Z, Siddiqi M, Siegel JH, Garcia ZC, Stein DS, Denny T, Deitch EA: Depressed interleukin-12-producing activity by monocytes correlates with adverse clinical course and a shift toward Th2-type lymphocyte pattern in severely injured male trauma patients. *Crit Care Med* 2003; 31:1722–9
40. Souter PJ, Thomas S, Hubbard AR, Poole S, Römisch J, Gray E: Antithrombin inhibits lipopolysaccharide-induced tissue factor and interleukin-6 production by mononuclear cells, human umbilical vein endothelial cells, and whole blood. *Crit Care Med* 2001; 29:134–9
41. Chaby R: Lipopolysaccharide-binding molecules: Transporters, blockers and sensors. *Cell Mol Life Sci* 2004; 61:1697–713
42. Warren HS, Novitsky TJ, Ketchum PA, Roslansky PF, Kania S, Siber GR: Neutralization of bacterial lipopolysaccharides by human plasma. *J Clin Microbiol* 1985; 22:590–5
43. Kumwenda ZL, Wong CB, Johnson JA, Gosnell JE, Welch WJ, Harris HW: Chylomicron-bound endotoxin selectively inhibits NF- $\kappa$ B activation in rat hepatocytes. *Shock* 2002; 18:182–8
44. Harris HW, Johnson JA, Wigmore SJ: Endogenous lipoproteins impact the response to endotoxin in humans. *Crit Care Med* 2002; 30:23–31
45. Haudek SB, Natmessnig BE, Fürst W, Bahrami S, Schlag G, Redl H: Lipopolysaccharide dose response in baboons. *Shock* 2003; 20:431–6
46. Haudek SB, Natmessnig BE, Redl H, Schlag G, Hatlen LE, Tobias PS: Isolation, partial characterization, and concentration in experimental sepsis of baboon lipopolysaccharide-binding protein. *J Lab Clin Med* 2000; 136:363–70
47. Taveira Da Silva AM, Kaulbach HC, Chuidian FS, Lambert DR, Suffredini AF, Danner RL: Brief report: Shock and multiple-organ dysfunction after self-administration of *Salmonella* endotoxin. *N Engl J Med* 1993; 328:1457–60
